# Supplementary material for: Crim1 has cell-autonomous and paracrine roles during embryonic heart development
Source: PubMed Central journal article supplement (PMC4731764; doi:10.1038/srep19832), 2016-01-29
Supplement: srep19832-s1.pdf [file srep19832-s1.pdf]

## Supplementary Information

### **Crim1 has cell-autonomous and paracrine roles during embryonic heart development.**

Swati Iyer<sup>1</sup>, Fang Yu Chou<sup>1</sup>, Richard Wang<sup>1</sup>, Han Sheng Chiu<sup>1</sup>, Vinay K. S. Raju<sup>1</sup>, Melissa H. Little<sup>2,3,4</sup>, Walter G. Thomas<sup>1</sup>, Michael Piper<sup>1,5#</sup>, David J. Pennisi<sup>1#</sup>.

<sup>1</sup>School of Biomedical Sciences, The University of Queensland, Brisbane, 4072, Australia,

<sup>2</sup>Institute for Molecular Bioscience, The University of Queensland, Brisbane, 4072, Australia,

<sup>3</sup>Murdoch Children's Research Institute, Melbourne, <sup>4</sup>Department of Pediatrics, University of

Melbourne and <sup>5</sup>Queensland Brain Institute, The University of Queensland, Brisbane, 4072,

Australia.

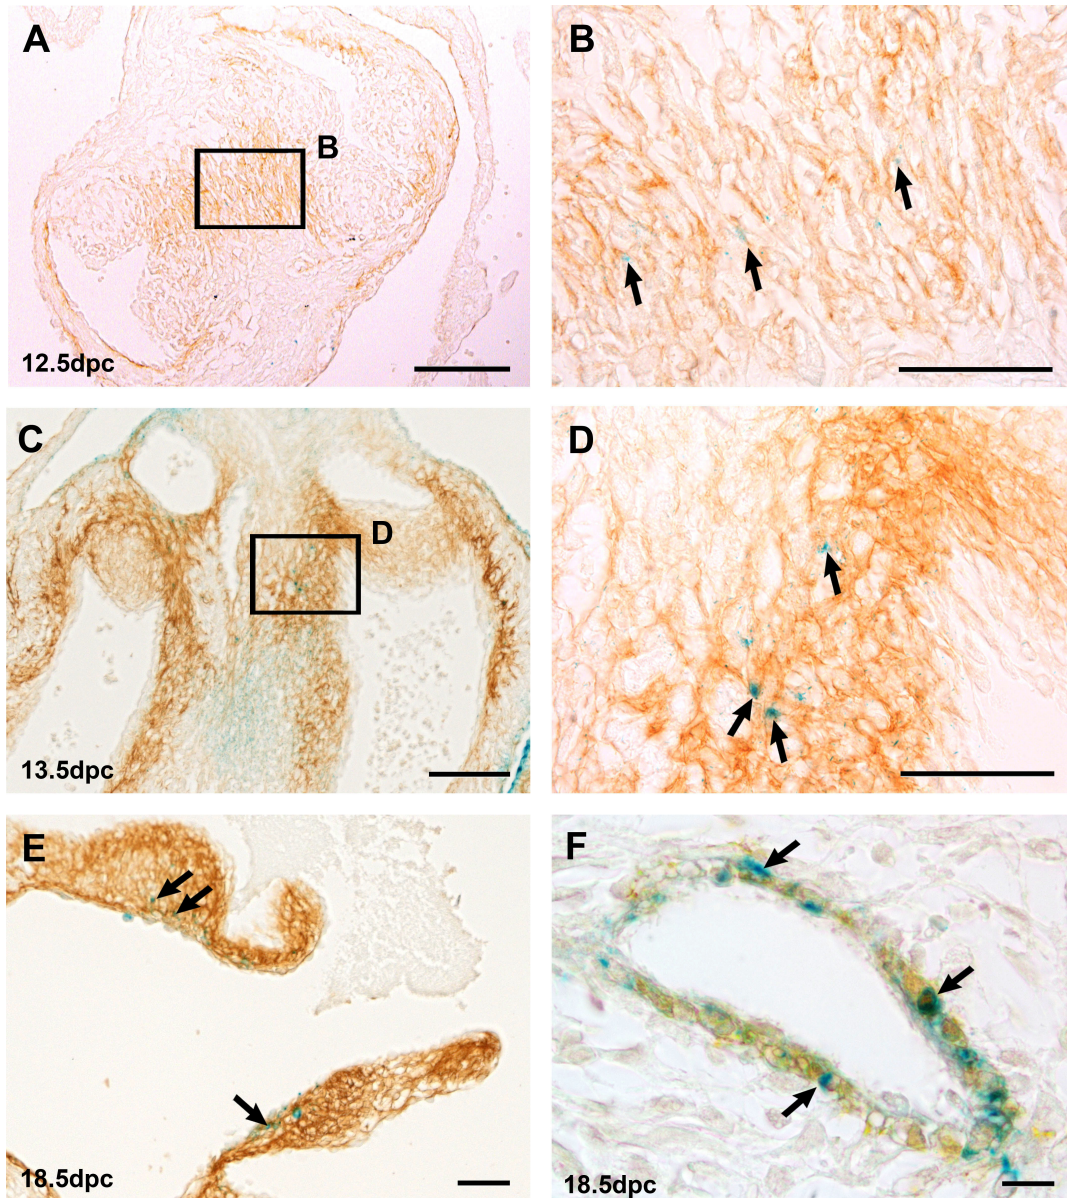

**Supplementary figure 1.** *Crim1* is expressed in the outflow tract, mitral valve leaflets and coronary vascular smooth muscle cells.

A, Periostin immunohistochemistry on an X-Gal stained *Crim1*<sup>+/KST264</sup> transverse section at 12.5 dpc. B, higher magnification view of the boxed area in A, showing periostin- and X-Gal-positive outflow tract mesenchymal cells (arrows). C, Periostin immunohistochemistry on an X-Gal stained *Crim1*<sup>+/KST264</sup> coronal section at 13.5 dpc. D, higher magnification view of boxed area in C, showing periostin- and X-Gal-positive mesenchymal cells (arrows). E, Periostin immunohistochemistry on an X-Gal stained *Crim1*<sup>+/KST264</sup> longitudinal section at 18.5 dpc. F, higher magnification view of boxed area in E, showing periostin- and X-Gal-positive coronary vascular smooth muscle cells (arrows).

Periostin immunohistochemistry on an X-Gal stained *CrimI*<sup>+/KST264</sup> coronal section at 18.5 dpc, showing periostin- and X-Gal-positive mitral valve leaflet cells (arrows). F, Transgelin immunohistochemistry on an X-Gal stained *CrimI*<sup>+/KST264</sup> coronal section at 18.5 dpc, showing transgelin- and X-Gal-positive coronary vascular smooth muscle cells (arrows). Scale bars, A, C, 100  $\mu\text{m}$ ; B, D, E, 40  $\mu\text{m}$ ; F, 10  $\mu\text{m}$ .

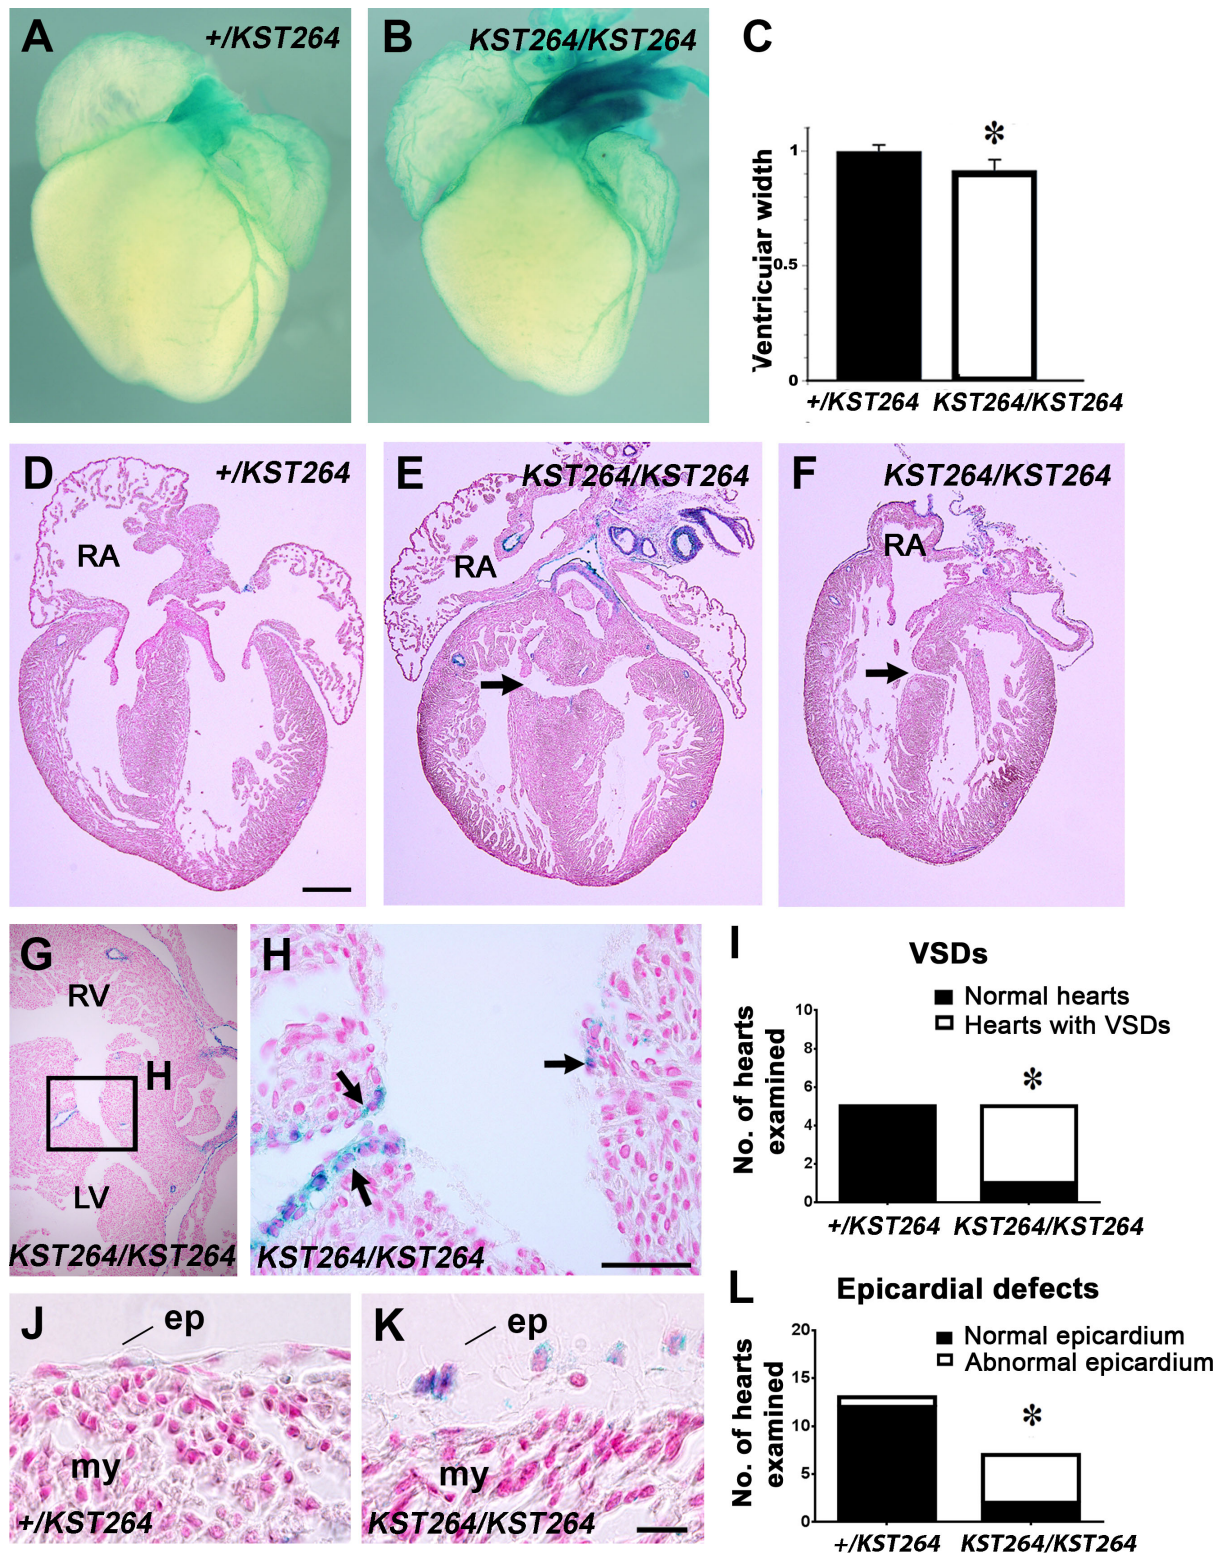

**Supplementary figure 2.** Congenital heart defects in  $Crim1^{KST264/KST264}$  embryos.

A–C, 18.5 dpc littermate hearts stained with X-Gal to reveal  $Crim1$ -LacZ expression (blue).

A,  $Crim1^{+/KST264}$  18.5 dpc heart. B,  $Crim1^{KST264/KST264}$  18.5 dpc heart. C, Quantification of the

size of the ventricular component at 18.5 dpc, showing a significant reduction in the width of *Crim1*<sup>KST264/KST264</sup> hearts (n=7-9). D-F, Coronal sections of 18.5 dpc hearts stained with X-Gal and counter-stained with nuclear fast red. The right atrium (RA) is labelled. D, *Crim1*<sup>+ /KST264</sup> 18.5 dpc heart showing normal morphology. E,F, *Crim1*<sup>KST264/KST264</sup> hearts displaying a prominent VSD, a communication between left and right ventricles (arrow). G, Another section of the heart in F, showing the VSD. H, View of the inset in G. Note the *Crim1*-LacZ-positive cells (arrows) in the IVS either side of the communication between the ventricles. I, Quantification of prevalence of VSDs in *Crim1*<sup>+ /KST264</sup> and *Crim1*<sup>KST264/KST264</sup> hearts (n=5). Z-Score -2.582. \*, P<0.01, J-L, Differing ventricular epicardial morphology between *Crim1*<sup>+ /KST264</sup> and *Crim1*<sup>KST264/KST264</sup> hearts. The epicardium (ep) appears less squamous-like in *Crim1*<sup>KST264/KST264</sup> hearts (my, myocardium). L, Quantification of prevalence of epicardial defects, (n=13-7). Z-Score -2.7118. \*, P<0.01. LV, left ventricle; RV, right ventricle. Scale bars D, 500  $\mu$ m; H, 50  $\mu$ m; K, 10  $\mu$ m.

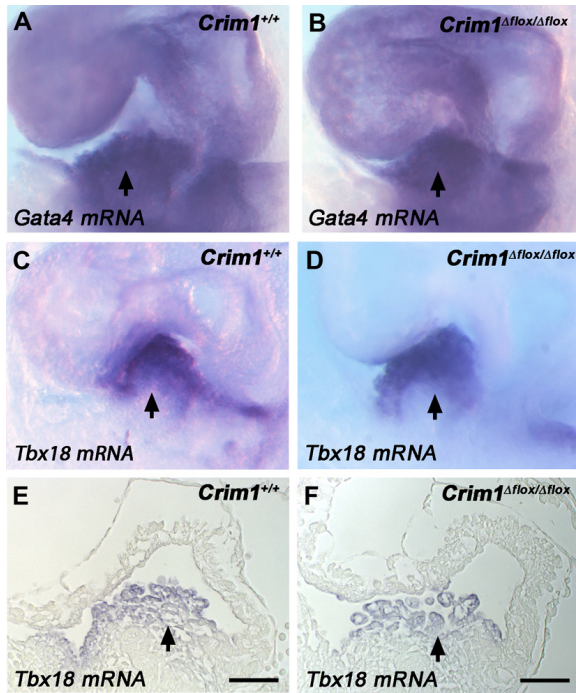

**Supplementary figure 3.** *Crim1* is not necessary for specification or early development of the proepicardium.

A-F, Micrographs of 9.5 dpc embryos from *Crim1*<sup>+/+</sup> (A, C, E) and *Crim1*<sup>Δflox/Δflox</sup> (B, D, F) embryos stained for *Gata4* mRNA expression (purple stain, A and B) and *Tbx18* mRNA expression (purple stain, C and D). E, F, Micrographs of histological sections of whole-mount *in situ* hybridization-stained embryos showing *Tbx18* expression. The PE is indicated (arrows). Scale bars A and E, 50 μm.

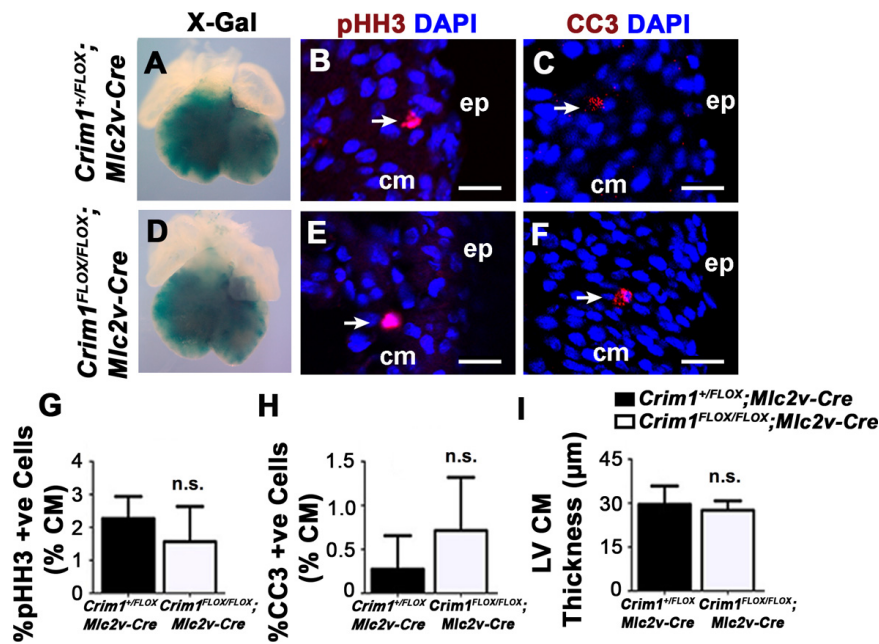

**Supplementary figure 4.** Myocardial deletion of Crim1 does not affect cardiomyocyte proliferation and survival and thickness of compact myocardium.

A, D representative whole mount images of X-Gal stained *Crim1<sup>+FLOX</sup>; Mlc2v-Cre; R26R* and *Crim1<sup>FLOX/FLOX</sup>; Mlc2v-Cre; R26R* hearts at 13.5 dpc. B, E merged confocal images of DAPI (blue) and pHH3 (red), with a pHH3-positive nucleus (arrow). C, F merged confocal images of DAPI (blue) and CC3 (red), with a CC3-positive nucleus (arrow). G, No significant difference in percentage of pHH3-positive cells in the compact myocardium of left and right ventricles in control and mutant hearts (n=4-6). H, No significant difference in percentage of CC3-positive cells in the compact myocardium of left and right ventricles in control and mutant hearts (n=4-5). I, No significant difference in thickness of compact myocardium in the left ventricle of control and mutant hearts (n=3). cm, compact myocardium; ep, epicardium; n.s, not significant. Scale bars B, C, E, F 20 μm.

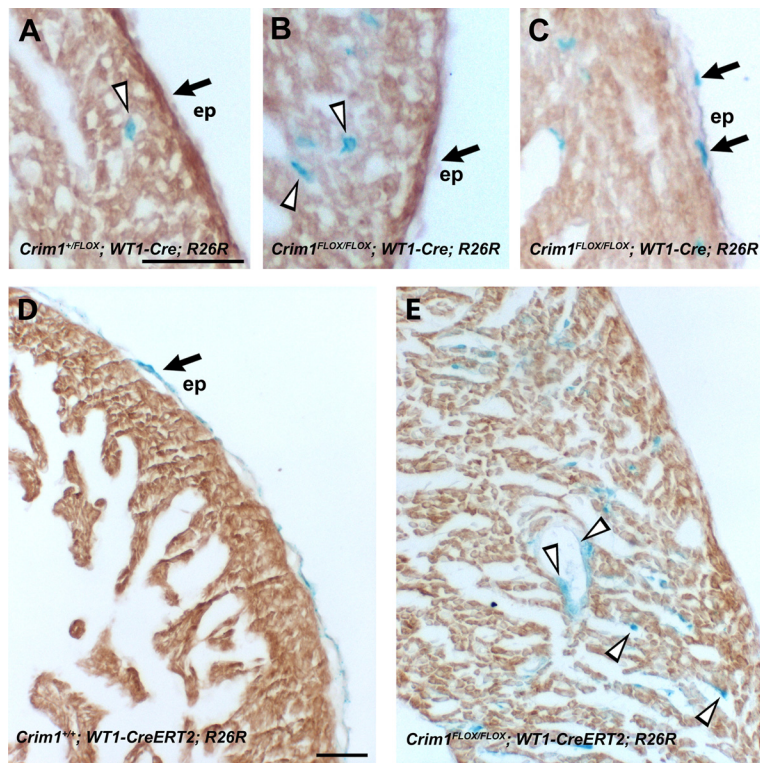

**Supplementary figure 5.** Fidelity of the *WT1-Cre* and *WT1-CreERT2* lines.

A-E, MF20 immunohistochemistry performed on A-C, 15.5 dpc *WT1-Cre* X-Gal stained sections showing MF20-negative epicardium (arrows) and MF20-negative EPDCs (open arrowheads), D, *WT1-CreERT2* 13.5 dpc X-gal stained section showing that most epicardial cells are X-Gal-positive (arrow), and E, *WT1-CreERT2* 17.5 dpc X-Gal stained section showing MF20-negative EPDCs (open arrowheads), confirming that the EPDCs are not cardiomyocytes. ep; epicardium. Scale bars A-C, 25 $\mu$ m; D-E, 50  $\mu$ m.



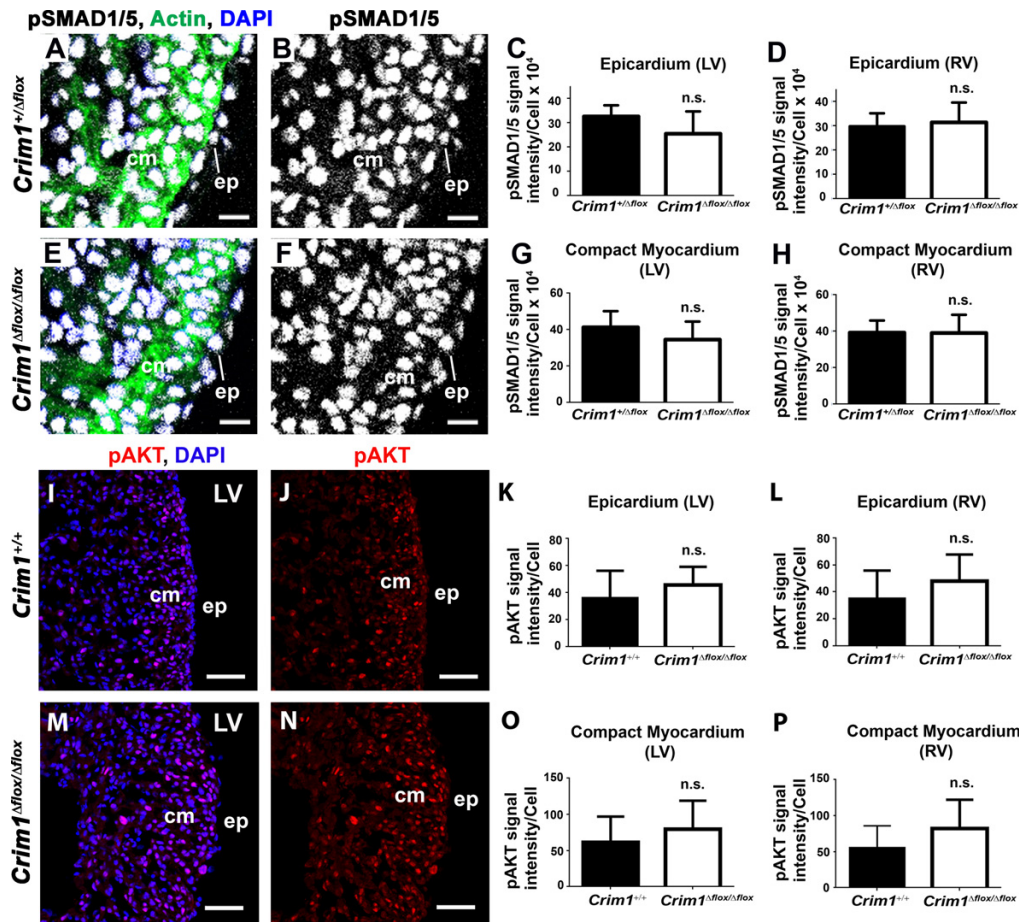

**Supplementary figure 6.** Phospho-SMAD1/5 and phospho-AKT levels are not significantly changed in the epicardium or myocardium of *Crim1*<sup>Δflox/Δflox</sup> hearts.

Confocal images of ventricular sections of 13.0 dpc hearts from *Crim1*<sup>+/Δflox</sup> (A, B) and *Crim1*<sup>Δflox/Δflox</sup> (E, F) embryos stained for phospho-SMAD1/5 (white). A and E, merged images of DAPI (blue) and actin (green) to delineate the myocardium with the phospho-SMAD1/5 (white) from A and E, respectively. C, D, G, and H, Quantification of the average signal intensity/cell after indirect immunofluorescence to detect phospho-SMAD1/5 showed there was no change in the levels in the epicardium or compact myocardium of left and right ventricles of *Crim1*<sup>Δflox/Δflox</sup> hearts in comparison to controls (n=5). Confocal images of ventricular sections of 13.5 dpc hearts from *Crim1*<sup>+/+</sup> (I, J) and *Crim1*<sup>Δflox/Δflox</sup> (M, N) embryos stained for phospho-AKT (red). Quantification of signal intensity/ cell after

immunofluorescence to detect phospho-AKT revealed no change in the levels in the epicardium or compact myocardium of left and right ventricles of *Crim1<sup>Afllox/Afllox</sup>* hearts in comparison to controls (n=5-6). cm, compact myocardium; ep, epicardium; n.s., not significant. Scale bars, A, B, E, F 10 $\mu$ m; I, J, M, N, 50  $\mu$ m.

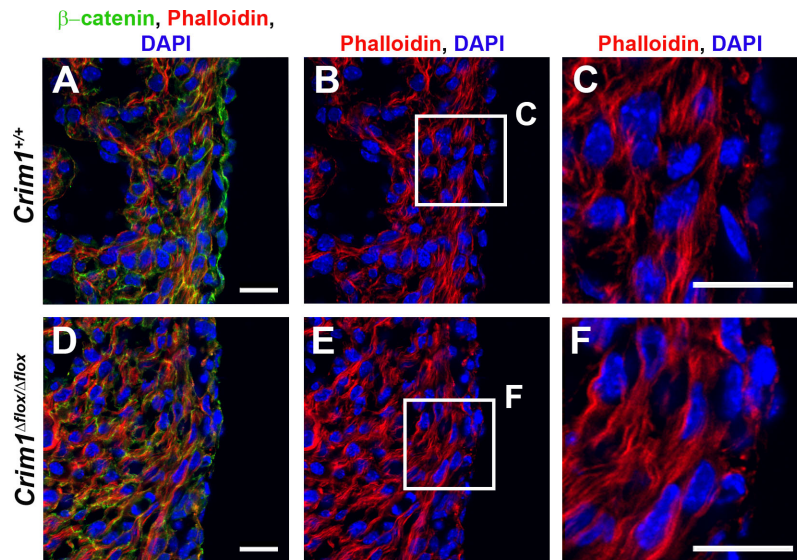

**Supplementary figure 7.** No visible change in filamentous actin morphology in the epicardium or myocardium of *Crim1*<sup>Δflox/Δflox</sup> hearts at 13.5 dpc.

A-F, Representative confocal images of ventricular sections of 13.5 dpc hearts from *Crim1*<sup>+/+</sup> (A, B, C) and *Crim1*<sup>Δflox/Δflox</sup> (D, E, F) hearts at 13.5 dpc. A, D merged images of DAPI (blue) and MF20 (green) to delineate the myocardium with Phalloidin (red) from B and E, respectively (n=4-5). C, F, magnified views of boxed regions in B and E respectively. Scale bars A – F, 20 μm.

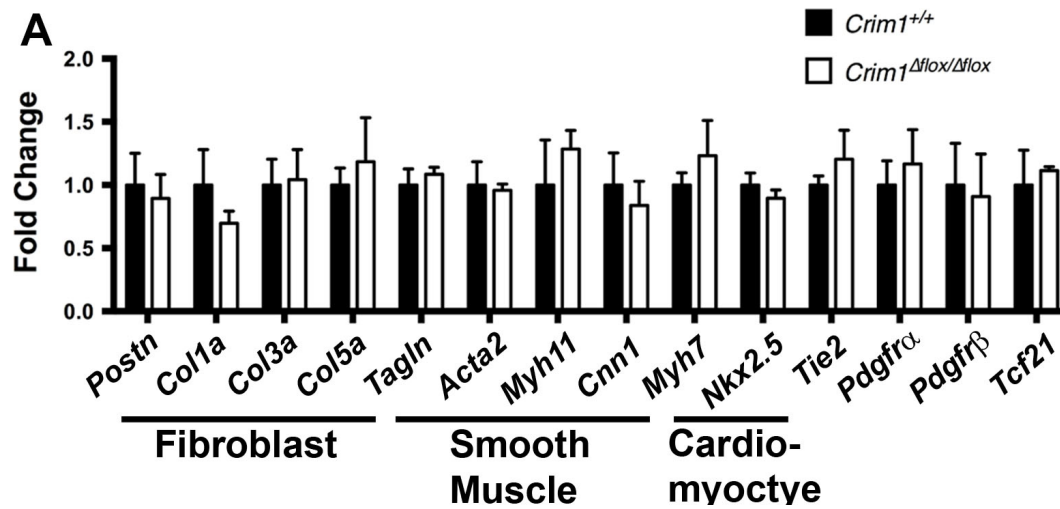

**Supplementary figure 8.** No change in the expression of key cardiac genes in *Crim1*<sup>Δflox/Δflox</sup> hearts at 17.5 dpc.

A, qPCR with fibroblast, smooth muscle and cardiomyocyte markers showing no significant difference in fold change between *Crim1*<sup>+/+</sup> and *Crim1*<sup>Δflox/Δflox</sup> ventricular samples at 17.5 dpc. Note that for *Collagen1a*, P=0.0556. (n=4-5).
